# Supplementary material for: Clonal Complexes 23, 10, 131 and 38 as Genetic Markers of the Environmental Spread of Extended-Spectrum β-Lactamase (ESBL)-Producing E. coli
Source: MDPI journal article supplement (doi:10.3390/antibiotics11111465), 2022-10-24
Supplement: s1 [file s1]

# SUPPLEMENTARY MATERIAL

Table S1. Main characteristics of the strains selected for this study

| N° strain | Origin <sup>1</sup> | Resistance gene           | Phylogroup    | ST         | CC <sup>2</sup> | Antibiotic resistance profile <sup>3</sup> |                                  |             |                        |               |                 |                   |               |               |                     |
|-----------|---------------------|---------------------------|---------------|------------|-----------------|--------------------------------------------|----------------------------------|-------------|------------------------|---------------|-----------------|-------------------|---------------|---------------|---------------------|
|           |                     |                           |               |            |                 | Penicillins                                | Cephalosporins                   | Monobactams | β-lactamase inhibitors | Carbapenems   | Aminoglycosides | Quinolones        | Tetracyclines | Others        | MDR<br>Extended MDR |
| 1         | Chicken (F)         | SHV-12                    | A             | ST6648     | NA              | AMP, PIP, MZ                               | CZ, CXM, CPD, CTX, CAZ, FEP      | AZT         | -                      | -             | -               | LV, CIP, MXF, NOR | TET           | CHL           | + +                 |
| 2         | Chicken (H)         | CTX-M-1                   | F             | ST117      | NA              | AMP, PIP, MZ                               | CZ, CXM, CPD, CTX, CAZ, FEP      | AZT         | AMS                    | -             | -               | -                 | TET           | SXT           | + +                 |
| 3         | Chicken (H)         | SHV-12, TEM-171           | B1            | ST101      | CC101           | AMP, PIP, MZ                               | CZ, CXM, CPD, CTX, CAZ, FEP      | AZT         | -                      | -             | -               | LV, CIP, MXF, NOR | TET           | CHL           | + +                 |
| 4         | Chicken (H)         | CTX-M-1                   | C             | ST23       | CC23            | AMP, PIP, MZ                               | CZ, CXM, CPD, CTX, CAZ, FEP      | AZT         | AMC, AMS, TZP          | ETP, MER, IMP | -               | LV, CIP, MXF, NOR | TET           | SXT, FOT      | + +                 |
| 5         | Chicken (N)         | SHV-12                    | F             | ST2085     | NA              | AMP, PIP, MZ                               | CZ, CXM, CPD, CTX, CAZ, FEP      | AZT         | -                      | -             | -               | -                 | TET           | CHL           | + +                 |
| 6         | Chicken (H)         | SHV-12, TEML-278          | Unknown       | ST2599     | NA              | AMP, PIP, MZ                               | CZ, CXM, CPD, CTX, CAZ, FEP      | AZT         | -                      | -             | -               | LV, CIP, MXF, NOR | TET           | SXT, CHL      | + +                 |
| 7         | Chicken (H)         | CTX-M-1                   | A             | ST373      | CC168           | AMP, PIP, MZ                               | CZ, CXM, CPD, CTX, CAZ, FEP      | AZT         | -                      | -             | -               | -                 | -             | -             | + -                 |
| 8         | Chicken (H)         | SHV-12, TEM-171           | Unknown       | ST2062     | NA              | AMP, PIP, MZ                               | CZ, CXM, CPD, CTX, CAZ, FEP      | AZT         | AMS                    | -             | GM, TO          | -                 | TET           | CHL           | + +                 |
| 9         | Chicken (H)         | SHV-12                    | F             | ST354      | CC354           | AMP, PIP, MZ                               | CZ, CXM, CPD, CTX, CAZ, FEP      | AZT         | -                      | -             | -               | LV, CIP, MXF, NOR | TET           | -             | + +                 |
| 10        | Turkey (M)          | SHV-12                    | Clade I or II | ST23       | CC23            | AMP, PIP, MZ                               | CZ, CXM, CPD, CTX, CAZ, FEP      | AZT         | -                      | -             | -               | MXF               | TET           | CHL           | + +                 |
| 11        | Turkey (M)          | SHV-12                    | A             | ST unknown | NA              | AMP, PIP, MZ                               | CZ, CXM, CPD, CTX, CAZ, FEP      | AZT         | -                      | -             | -               | LV, CIP, MXF, NOR | TET           | CHL           | + +                 |
| 12        | Chicken (N)         | SHV-12                    | A             | ST665      | NA              | AMP, PIP, MZ                               | CZ, CXM, CPD, CTX, CAZ, FEP      | AZT         | -                      | -             | -               | MXF               | TET           | CHL           | + +                 |
| 13        | Chicken (S)         | SHV-12, TEM-171           | F             | ST354      | CC354           | AMP, PIP, MZ                               | CZ, CXM, CPD, CTX, CAZ, FEP      | AZT         | -                      | -             | -               | LV, CIP, MXF, NOR | TET           | SXT, CHL      | + +                 |
| 14        | Chicken (S)         | SHV-12, CTX-M-1           | A             | ST93       | CC168           | AMP, PIP, MZ                               | CZ, CXM, CPD, CTX, CAZ, FEP      | AZT         | -                      | -             | -               | LV, CIP, MXF, NOR | TET           | CHL           | + +                 |
| 15        | Chicken (F)         | SHV-12, TEM-171           | B1            | ST937      | NA              | AMP, PIP, MZ                               | CZ, CXM, CPD, CTX, CAZ, FEP      | AZT         | -                      | -             | -               | -                 | -             | -             | + -                 |
| 16        | Chicken (F)         | SHV-12, TEM-171, CTX-M-1  | A             | ST10       | CC10            | AMP, PIP, MZ                               | CZ, CXM, CPD, CTX, CAZ, FOX, FEP | AZT         | AMC                    | -             | GM, TO          | -                 | -             | -             | + +                 |
| 17        | Chicken (F)         | SHV-12                    | F             | ST117      | NA              | AMP, PIP, MZ                               | CZ, CXM, CPD, CTX, CAZ, FEP      | AZT         | -                      | -             | -               | -                 | TET           | -             | + -                 |
| 18        | Chicken (F)         | CTX-M14                   | F             | ST117      | NA              | AMP, PIP, MZ                               | CZ, CXM, CPD, CTX, CAZ, FEP      | AZT         | AMS                    | -             | -               | LV, CIP, MXF, NOR | TET           | SXT           | + +                 |
| 19        | Chicken (N)         | -                         | B1            | ST1524     | NA              | AMP, PIP, MZ                               | CZ, CXM, CPD, CTX, CAZ, FEP      | AZT         | AMS                    | -             | -               | LV, CIP, MXF, NOR | TET           | CHL           | + +                 |
| 20        | Chicken (F)         | SHV-12, TEM-171, CTX-M-14 | A             | ST6094     | NA              | AMP, PIP, MZ                               | CZ, CXM, CPD, CTX, CAZ, FEP      | AZT         | -                      | -             | -               | LV, CIP, MXF, NOR | -             | -             | + -                 |
| 21        | Turkey (F)          | TEML-278                  | B1            | ST unknown | NA              | AMP, PIP, MZ                               | CZ, CXM, CPD, CTX, CAZ, FOX, FEP | AZT         | AMS                    | -             | -               | CIP, MXF          | TET, TIG      | SXT           | + +                 |
| 22        | Water (R)           | TEML-278, CTX-M-14        | B1            | ST1434     | NA              | AMP, PIP, MZ                               | CZ, CXM, CPD, CTX, CAZ, FOX, FEP | AZT         | AMS                    | -             | GM, TO          | LV, CIP, MXF, NOR | TET           | SXT, FOT, CHL | + +                 |
| 23        | Water (R)           | TEML-278, CTX-M-14        | B1            | ST1434     | NA              | AMP, PIP, MZ                               | CZ, CXM, CPD, CTX, FOX, FEP      | AZT         | AMC, AMS               | -             | GM, TO          | LV, CIP, MXF, NOR | TET           | SXT, FOT, CHL | + +                 |
| 24        | Water (R)           | TEML-278, CTX-M-14        | A             | ST746      | NA              | AMP, PIP, MZ                               | CZ, CXM, CPD, CTX, FOX, FEP      | AZT         | AMC, AMS               | -             | GM, TO          | LV, CIP, MXF, NOR | TET           | SXT, FOT, CHL | + +                 |
| 25        | Water (R)           | CTX-M-15                  | C             | ST410      | CC23            | AMP, PIP, MZ                               | CZ, CXM, CPD, CTX, CAZ, FOX, FEP | AZT         | AMC, AMS               | MER           | -               | LV, CIP, MXF, NOR | TET, TIG      | SXT, CHL      | + +                 |
| 26        | Water (R)           | TEML-278, CTX-M-14        | B1            | ST2599     | NA              | AMP, PIP, MZ                               | CZ, CXM, CPD, CTX, CAZ, FEP      | AZT         | AMS                    | -             | -               | LV, CIP, MXF, NOR | TET           | -             | + +                 |
| 27        | Water (R)           | CTX-M-1                   | A             | ST1486     | NA              | AMP, PIP, MZ                               | CZ, CXM, CPD, CTX, CAZ, FEP      | AZT         | -                      | -             | -               | -                 | TET           | CHL           | + +                 |
| 28        | Water (R)           | CTX-M-1                   | A             | ST1486     | NA              | AMP, PIP, MZ                               | CZ, CXM, CPD, CTX, CAZ, FEP      | AZT         | -                      | -             | -               | -                 | TET           | CHL           | + +                 |
| 29        | Water (R)           | TEML-278, SHV-12          | B1            | ST971      | NA              | AMP, PIP, MZ                               | CZ, CXM, CPD, CTX, CAZ, FEP      | AZT         | -                      | -             | -               | -                 | TET           | -             | + -                 |
| 30        | Water (R)           | -                         | Unknown       | ST unknown | NA              | -                                          | -                                | -           | -                      | -             | -               | -                 | -             | COL           | - -                 |
| 31        | Water (W)           | CTX-M-1                   | A             | ST6701     | NA              | AMP, PIP, MZ                               | CZ, CXM, CPD, CTX, CAZ, FEP      | AZT         | AMS                    | -             | -               | -                 | TET           | -             | + +                 |
| 32        | Water (W)           | TEML-278, CTX-M-14        | B2            | ST131      | CC131           | AMP, PIP, MZ                               | CZ, CXM, CPD, CTX, CAZ, FEP      | -           | -                      | -             | -               | LV, CIP, MXF, NOR | -             | -             | + -                 |
| 33        | Water (W)           | CTX-M-14                  | D             | ST2914     | CC349           | AMP, PIP, MZ                               | CZ, CXM, CPD, CTX, CAZ, FOX, FEP | AZT         | AMS                    | -             | -               | -                 | -             | SXT, FOT      | + +                 |

| N° strain | Origin <sup>1</sup> | Resistance gene             | Phylogroup | ST         | CC <sup>2</sup> | Antibiotic resistance profile <sup>3</sup> |                                  |             |                        |               |                 |                   |               |          |                     |   |  |
|-----------|---------------------|-----------------------------|------------|------------|-----------------|--------------------------------------------|----------------------------------|-------------|------------------------|---------------|-----------------|-------------------|---------------|----------|---------------------|---|--|
|           |                     |                             |            |            |                 | Penicillins                                | Cephalosporins                   | Monobactams | β-lactamase inhibitors | Carbapenems   | Aminoglycosides | Quinolones        | Tetracyclines | Others   | MDR<br>Extended MDR |   |  |
| 34        | Water (W)           | CTX-M-15                    | B2         | ST636      | NA              | AMP, PIP, MZ                               | CZ, CXM, CPD, CTX, CAZ, FEP      | AZT         | -                      | -             | -               | -                 | -             | SXT      | +                   | - |  |
| 35        | Water (W)           | SHV-12, CTX-M-1             | A          | ST10       | CC10            | AMP, PIP, MZ                               | CZ, CXM, CPD, CTX, CAZ, FEP      | AZT         | -                      | -             | -               | LV, CIP, MXF, NOR | -             | CHL      | +                   | + |  |
| 36        | Water (W)           | TEML-278, SHV-12, CTX-M-1   | B1         | ST162      | CC469           | AMP, PIP, MZ                               | CZ, CXM, CPD, CTX, CAZ, FEP      | AZT         | AMC, AMS, TZP          | -             | -               | LV, CIP, MXF, NOR | TET           | SXT, CHL | +                   | + |  |
| 37        | Water (W)           | TEM-171, CTX-M-1            | B1         | ST1123     | NA              | AMP, PIP, MZ                               | CZ, CXM, CPD, CTX, CAZ, FEP      | AZT         | AMS                    | -             | -               | -                 | -             | -        | +                   | - |  |
| 38        | Water (W)           | TEML-278, CTX-M-14          | D          | ST38       | CC38            | AMP, PIP, MZ                               | CZ, CXM, CPD, CTX, CAZ, FEP      | -           | AMS                    | -             | GM, TO          | -                 | TET           | SXT      | +                   | + |  |
| 39        | Water (W)           | TEML-278, CTX-M-14          | D          | ST38       | CC38            | AMP, PIP, MZ                               | CZ, CXM, CPD, CTX, CAZ, FEP      | -           | AMS                    | -             | GM, TO          | -                 | TET           | SXT      | +                   | + |  |
| 40        | Water (W)           | TEML-278, CTX-M-1           | D          | ST unknown | NA              | AMP, PIP, MZ                               | CZ, CXM, CPD, CTX, CAZ, FEP      | AZT         | -                      | -             | GM, TO          | LV, CIP, MXF, NOR | TET           | SXT, FOT | +                   | + |  |
| 41        | Water (W)           | TEM-171, CTX-M-15           | A          | ST4599     | NA              | AMP, PIP, MZ                               | CZ, CXM, CPD, CTX, CAZ, FEP      | AZT         | -                      | -             | -               | -                 | TET           | -        | +                   | - |  |
| 42        | Water (W)           | TEML-278, CTX-M-15          | A          | ST227      | CC10            | AMP, PIP, MZ                               | CZ, CXM, CPD, CTX, CAZ, FEP      | AZT         | AMC, AMS               | -             | -               | -                 | -             | FOT      | +                   | + |  |
| 43        | Water (W)           | TEM-176, CTX-M-14, CTX-M-15 | E          | ST130      | CC31            | AMP, PIP, MZ                               | CZ, CXM, CPD, CTX, CAZ, FEP      | -           | -                      | -             | -               | -                 | -             | -        | -                   | - |  |
| 44        | Water (W)           | OXA-1, CTX-M-15             | B2         | ST131      | CC131           | AMP, PIP, MZ                               | CZ, CXM, CPD, CTX, CAZ, FEP      | AZT         | AMC, AMS               | -             | TO              | LV, CIP, MXF, NOR | -             | SXT      | +                   | + |  |
| 45        | Water (W)           | TEML-278                    | A          | ST52       | NA              | AMP, PIP, MZ                               | CZ, CXM, CPD, CTX, FOX, FEP      | AZT         | AMC, AMS, TZP          | ETP, MER, IMP | -               | LV, CIP, MXF, NOR | -             | SXT, FOT | +                   | + |  |
| 46        | Water (C)           | CTX-M-15                    | B1         | ST297      | NA              | AMP, PIP, MZ                               | CZ, CXM, CPD, CTX, CAZ, FEP      | AZT         | AMC, AMS               | -             | -               | LV, CIP, MXF, NOR | TET           | SXT, CHL | +                   | + |  |
| 47        | Water (C)           | CTX-M-15                    | Unknown    | ST unknown | NA              | AMP, PIP, MZ                               | CZ, CXM, CPD, CTX, CAZ, FOX, FEP | AZT         | AMC, AMS, TZP          | -             | -               | -                 | -             | COL, FOT | +                   | + |  |
| 48        | Water (C)           | mcr-1                       | B2         | ST155      | CC155           | -                                          | -                                | -           | -                      | -             | -               | LV, CIP, MXF, NOR | TET           | COL, SXT | +                   | - |  |
| 49        | Healthy carrier     | TEM-116, CTX-M14            | B1         | ST971      | NA              | AMP                                        | CZ, CXM, FEP                     | -           | -                      | -             | -               | -                 | TET           | COL      | +                   | - |  |
| 50        | Healthy carrier     | TEM-116, CTX-M14            | A          | ST2404     | NA              | AMP, PIP, MZ                               | CZ, CXM, CPD, CTX, CAZ, FEP      | AZT         | -                      | -             | GM, TO          | -                 | TET           | STX      | +                   | + |  |
| 51        | Healthy carrier     | TEML-171, CTX-M1            | D          | ST38       | CC38            | AMP, MZ                                    | CZ, CXM, CPD, CAZ, FOX           | -           | AMC, AMS               | -             | -               | -                 | -             | -        | +                   | - |  |
| 52        | Healthy carrier     | TEML-171, CTX-M1            | Unknown    | ST unknown | NA              | AMP, PIP, MZ                               | CZ, CXM, CPD, CTX, CAZ, FEP      | AZT         | AMS                    | -             | -               | -                 | -             | STX      | +                   | + |  |
| 53        | Healthy carrier     | TEM-171, CTX-M14, CTX-M15   | B2         | ST131      | CC131           | AMP, PIP, MZ                               | CZ, CXM, CPD, CTX, CAZ, FEP      | AZT         | AMS                    | -             | -               | -                 | -             | STX      | +                   | + |  |
| 54        | Healthy carrier     | CTX-M14                     | A          | ST unknown | NA              | AMP, PIP, MZ                               | CZ, CXM, CPD, CTX, CAZ, FEP      | AZT         | -                      | -             | -               | -                 | TET           | STX      | +                   | + |  |
| 55        | Healthy carrier     | TEM-171                     | A          | ST unknown | NA              | AMP, PIP, MZ                               | CZ, CXM, CPD, CTX, CAZ, FEP      | AZT         | -                      | -             | -               | LV, CIP, MXF, NOR | TET           | STX      | +                   | + |  |
| 56        | Healthy carrier     | TEM-171, CTX-M15            | B2         | ST131      | CC131           | AMP, PIP, MZ                               | CZ, CXM, CPD, CTX, CAZ, FEP      | AZT         | AMC, AMS               | -             | -               | LV, CIP, MXF, NOR | -             | COL      | +                   | + |  |
| 57        | Healthy carrier     | TEM-171, CTX-M15            | B2         | ST131      | CC131           | AMP, PIP, MZ                               | CZ, CXM, CPD, CTX, CAZ, FEP      | AZT         | AMS                    | -             | -               | LV, CIP, MXF, NOR | -             | FOT      | +                   | + |  |
| 58        | Healthy carrier     | CTX-M14                     | B2         | ST131      | CC131           | AMP, PIP, MZ                               | CZ, CXM, CPD, CTX, CAZ, FEP      | AZT         | -                      | -             | -               | LV, CIP, MXF, NOR | -             | -        | +                   | - |  |
| 59        | Healthy carrier     | CTX-M14                     | B2         | ST131      | CC131           | AMP, PIP, MZ                               | CZ, CXM, CPD, CTX, CAZ, FEP      | AZT         | -                      | -             | -               | LV, CIP, MXF, NOR | -             | -        | +                   | - |  |
| 60        | Healthy carrier     | CTX-M15                     | C          | ST unknown | NA              | AMP, PIP, MZ                               | CZ, CXM, CPD, CTX, CAZ, FEP      | AZT         | AMS                    | -             | -               | LV, CIP, MXF, NOR | -             | STX      | +                   | + |  |
| 61        | Healthy carrier     | -                           | D          | ST unknown | NA              | AMP, PIP, MZ                               | CZ, CXM, CPD, CTX, CAZ, FEP      | AZT         | -                      | -             | -               | LV, CIP, MXF, NOR | -             | STX      | +                   | + |  |

<sup>1</sup> F, fillet; H, hamburger; N, nugget; M, meatballs; S, sausage; R, river; W, WWTP; C, collector.

<sup>2</sup> NA: not associated with any known clonal complex.

<sup>3</sup>AMP, ampicillin; PIP, piperacillin; MZ, mezlocillin; CZ, cefazolin; CXM, cefuroxime; CPD, cefpodoxime; CTX, cefotaxime; CAZ, ceftazidime; FOX, ceftiofur; FEP, cefepime; AZT, aztreonam; AMC, amoxicillin-clavulanic acid; AMS, ampicillin-sulbactam; TZP, piperacillin-tazobactam; ETP, ertapenem; MER, meropenem; IMP, imipenem; GM, gentamicin; TO, tobramycin; LV, levofloxacin; CIP, ciprofloxacin; MXF, moxifloxacin; NOR, norfloxacin; TET, tetracycline; TIG, tigecycline; SXT, trimethoprim-sulfamethoxazole; COL, colistin; FOT, fosfomycin; CHL, chloramphenicol.
